# Supplementary material
Source: Springer Nature journal article supplement (https://www.springermedizin.de/resource/supplementary/12888_2008_475_MOESM1_ESM.pdf/9483362)

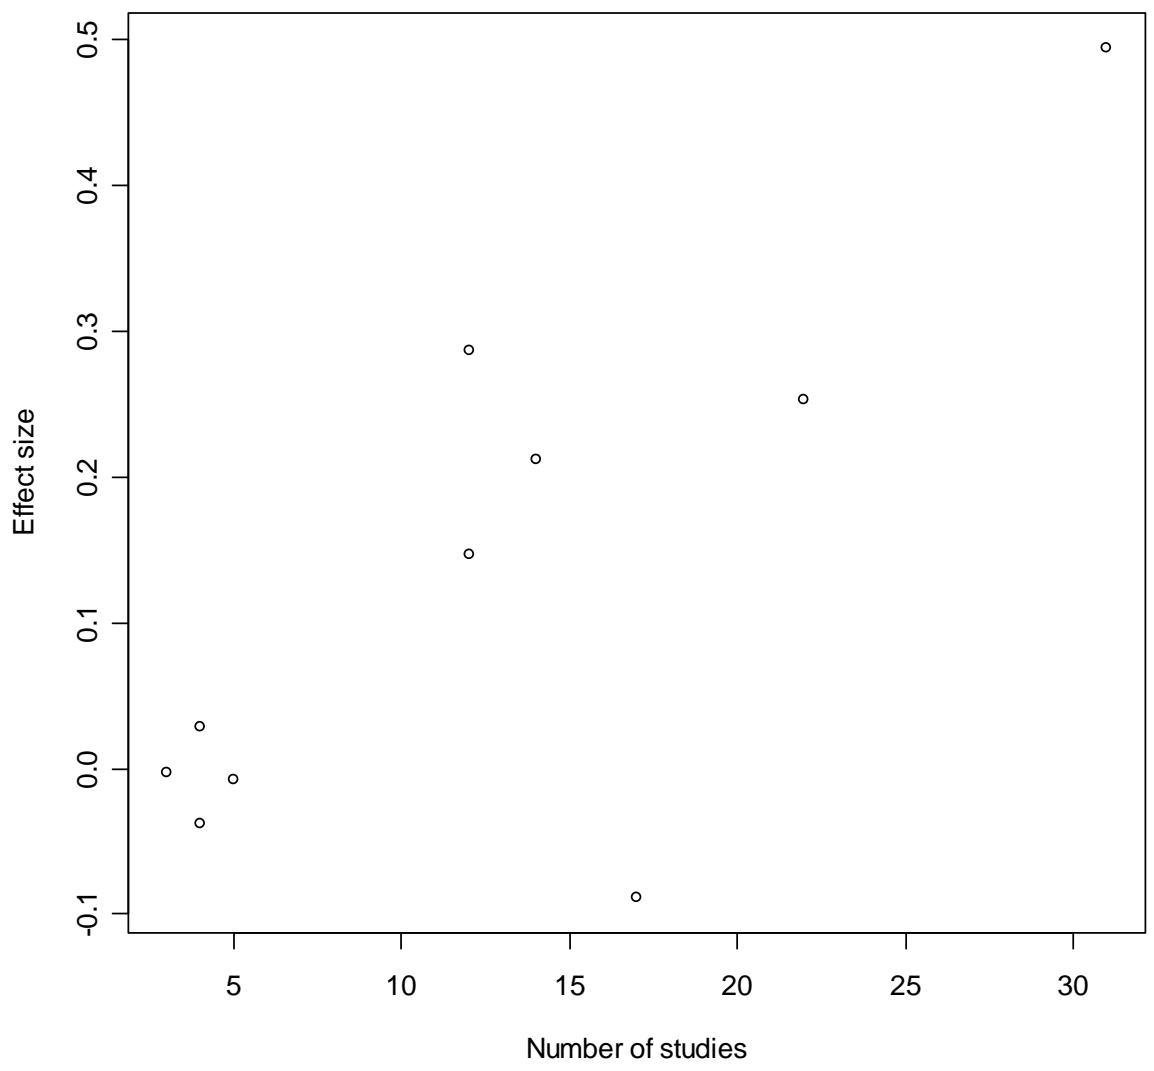

Supplement: MOESM1 [file 9483362]
